# Supplementary material
Source: ML conference proceedings conference paper supplement (https://proceedings.neurips.cc/paper_files/paper/2023/hash/97c903fbf21a7d863af2015d8803ca8f-Abstract.html)
Supplement: Supplementary file 1 [file 97c903fbf21a7d863af2015d8803ca8f-Supplemental-Conference.zip]

Archive with 4 entries (4 files):
- appendices.pdf
- __MACOSX/._appendices.pdf
- full.pdf
- __MACOSX/._full.pdf
